# Supplementary material for: Covalent-organic framework nanobionics for robust cytoprotection
Source: Royal Society of Chemistry journal article supplement (doi:10.1039/d3sc04973f), 2023-12-13
Supplement: d3sc04973f1.pdf [file d3sc04973f1.pdf]

## Covalent-organic framework nanobionics for robust cytoprotection

Jieying Liang,<sup>\*†a</sup> Qianfan Chen,<sup>†b</sup> Joel Yong<sup>a</sup>, Hiroki Suyama,<sup>c</sup> Joanna Biazik,<sup>d</sup> Bosiljka Njegic,<sup>e</sup>  
Aditya Rawal,<sup>e</sup> Kang Liang<sup>\*a,b</sup>

<sup>a</sup>School of Chemical Engineering and Australian Centre for NanoMedicine, The University of New South Wales, Sydney, NSW 2052, Australia

<sup>b</sup>Graduate School of Biomedical Engineering, The University of New South Wales, Sydney, NSW 2052, Australia

<sup>c</sup>UNSW RNA Institute, The University of New South Wales, Sydney, NSW 2052, Australia

<sup>d</sup>Electron Microscope Unit, Mark Wainwright Analytical Centre, The University of New South Wales, NSW 2052, Australia

<sup>e</sup>Nuclear Magnetic Resonance Facility, Mark Wainwright Analytical Centre, University of New South Wales, Sydney, NSW, 2052 Australia

<sup>†</sup>The authors contributed equally in this work

\*Email: jieying.liang@unsw.edu.au; kang.liang@unsw.edu.au

| Samples            | BET surface area (m <sup>2</sup> /g) | Total pore volume (cm <sup>3</sup> /g) | pore size (nm) |
|--------------------|--------------------------------------|----------------------------------------|----------------|
| COF <sup>[1]</sup> | 73.5                                 | 0.42                                   | 1.89           |
| Yeast              | 3.2                                  | 0.03                                   | 8.3            |
| Yeast-COF          | 22.5                                 | 0.13                                   | 12.6           |

**Table S1.** The N<sub>2</sub> physisorption isotherms yeast and yeast-COF, and their pore sizes.

**Table S2.** The downregulated and upregulated genes of yeast-COF compared to native yeast and their

functional

analysis.

| Downregulated genes | Functional analysis                                                       |
|---------------------|---------------------------------------------------------------------------|
| YPR170C             |                                                                           |
| YER067C-A           |                                                                           |
| YKL136W             | Unknown or predicted nonfunctionally                                      |
| YGR039W             |                                                                           |
| YGL118C             |                                                                           |
| YOL058W             |                                                                           |
| snR39B              | Ribosome and amino acid biosynthesis                                      |
| TL(CAA)L            |                                                                           |
| YHR136C             | kinase inhibitor                                                          |
| Upregulated genes   |                                                                           |
| YIL053W             |                                                                           |
| YDR044W             | A possible disruption to the oxygen availability                          |
| YBR085W             |                                                                           |
| YBR054W             |                                                                           |
| YGL008C             | Stress responses                                                          |
| YLL024C             |                                                                           |
| YJL045W             | Links the tricarboxylic acid (TCA) cycle and the electron transport chain |
| YNL117W             | Involved in the glyoxylate bypass of the full TCA cycle                   |
| Others              | Related to amino acid biosynthesis                                        |

| Nanoshell composition                                                                                                           | Properties                                                                                                                                                                                                | Ref.      |
|---------------------------------------------------------------------------------------------------------------------------------|-----------------------------------------------------------------------------------------------------------------------------------------------------------------------------------------------------------|-----------|
| COF                                                                                                                             | Induced a superior protection against high temperature (100 °C) and acid condition (pH 2). Further catalase coating enables yeast fermentation and ethanol production even under strong oxidative stress. | This work |
| ZIF-8                                                                                                                           | Induced the yeast cell hibernation state.                                                                                                                                                                 | [2]       |
| ZIF-8                                                                                                                           | Nanocoating with $\beta$ -galactosidase allowed yeast to survive in nutrient-depleted environments.                                                                                                       | [3]       |
| MOF<br>[Zr <sub>6</sub> O <sub>4</sub> (OH) <sub>4</sub> (BTB) <sub>2</sub> (OH) <sub>6</sub> (H <sub>2</sub> O) <sub>6</sub> ] | Enhanced the lifetime of anaerobes in the presence of O <sub>2</sub> , and maintains the continuous production of acetic acid from CO <sub>2</sub> .                                                      | [4]       |
| ZIF-8                                                                                                                           | Allow mass and energy exchange between chloroplasts and the environment, and protect chloroplasts from microbiological degradation.                                                                       | [5]       |
| Metal–Polyphenol Nanoshell                                                                                                      | Enabled controllably degraded on-demand, while protected the yeast from multiple external aggressors, including UV irradiation, lytic enzymes, and silver nanoparticles.                                  | [6]       |
| Alginate/Polydopamine<br>Core/Shell Microcapsules                                                                               | Prevented gel swelling and cell leakage, and increased resistance against enzymatic attack and UV irradiation.                                                                                            | [7]       |
| SiO <sub>2</sub>                                                                                                                | Enhanced defense against high temperature (49 to 53 °C).                                                                                                                                                  | [8]       |
| SiO <sub>2</sub> –TiO <sub>2</sub>                                                                                              | Controlled the cell division and effectively dissipated heat energy.                                                                                                                                      | [9]       |
| Polyelectrolytes/Multiwalled<br>Carbon Nanotubes                                                                                | Affected the electron mediation between the encapsulated yeast cells and the artificial electron acceptor.                                                                                                | [10]      |

**Table S3.** Comparison of yeast-COF system to the other reported system.

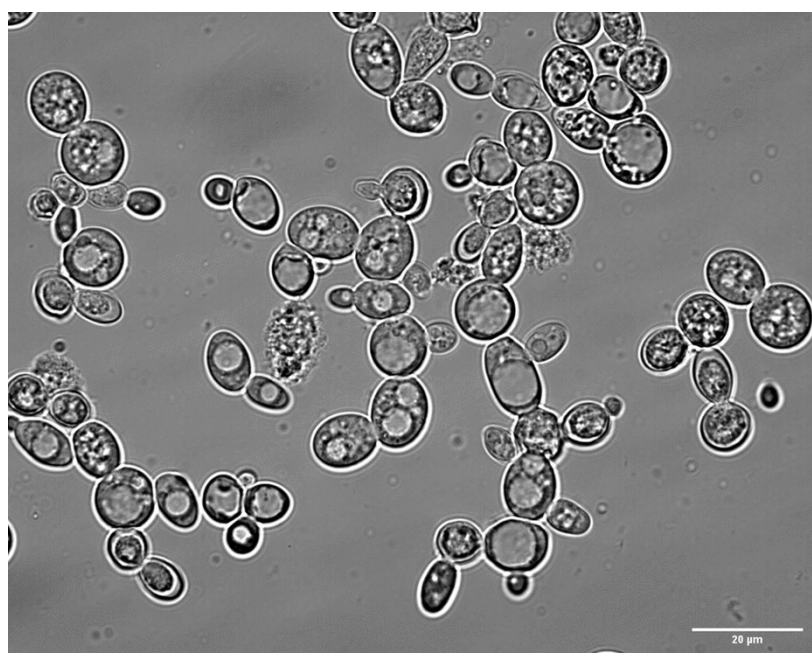

**Figure S1.** Optical micrograph of native yeast.

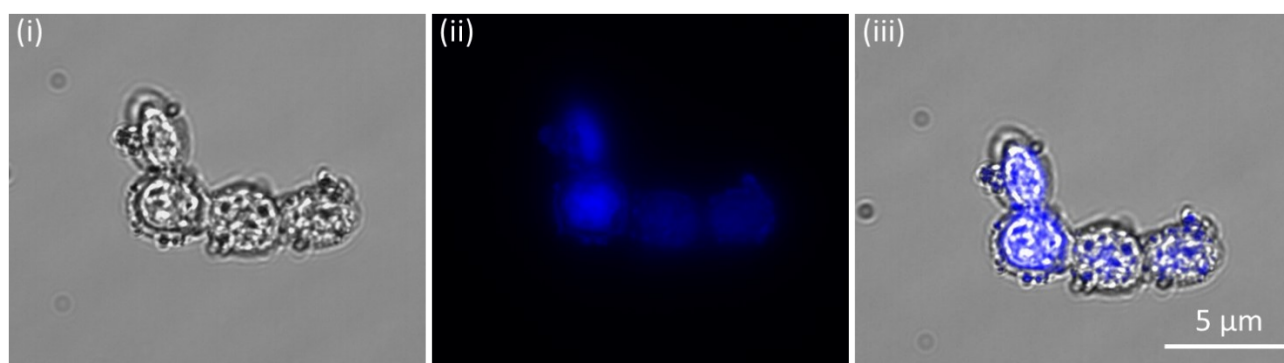

**Figure S2.** The homogeneous formation of the COF-LZU1-based exoskeleton around yeast. (i) Bright field image; (ii) Fluorescent image of Alexa Fluor 350-labelled COF-LZU1 (blue); (iii) The overlay of image of (i) and (ii).

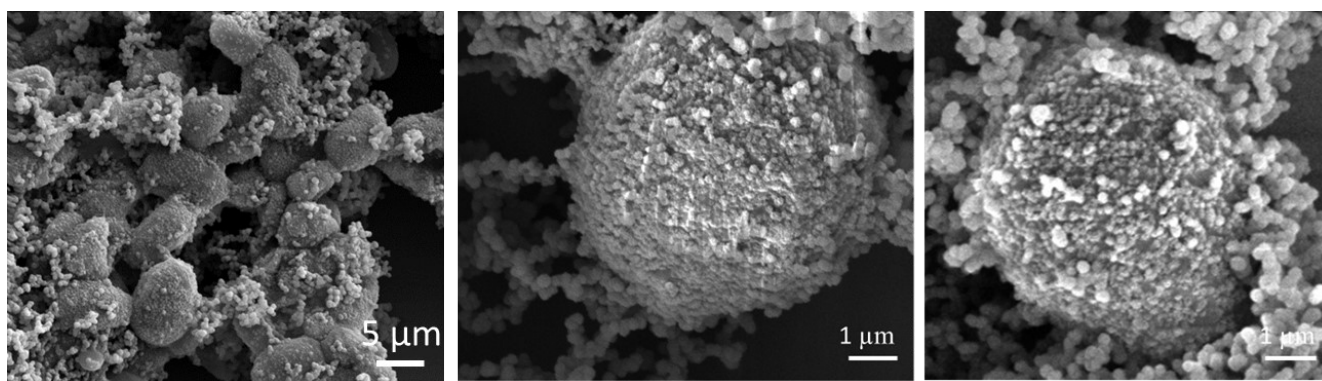

**Figure S3.** SEM images of yeast-COF.

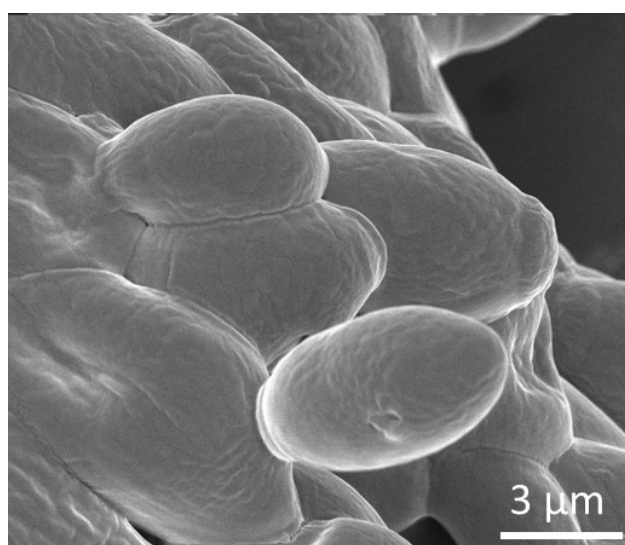

**Figure S4.** SEM image of native yeast cells.

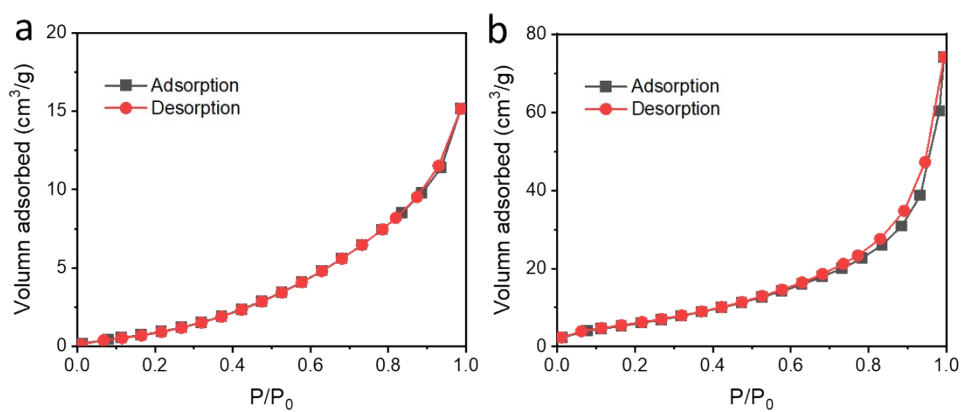

**Figure S5.** N<sub>2</sub> adsorption isotherm at 77 K of (a) yeast, (b) yeast-COF.

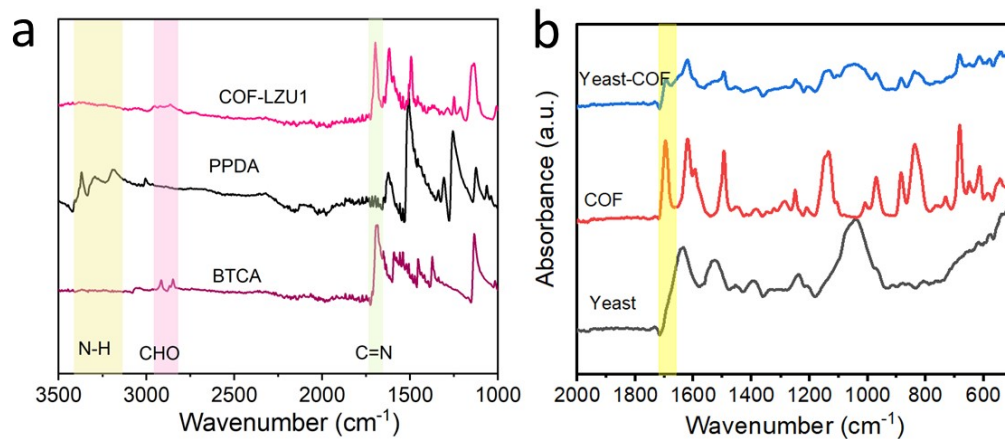

**Figure S6.** (a) FTIR spectra of BTCA, PPDA and COF-LZU1; (b) FTIR spectra of native yeast, COF, and yeast-COF.

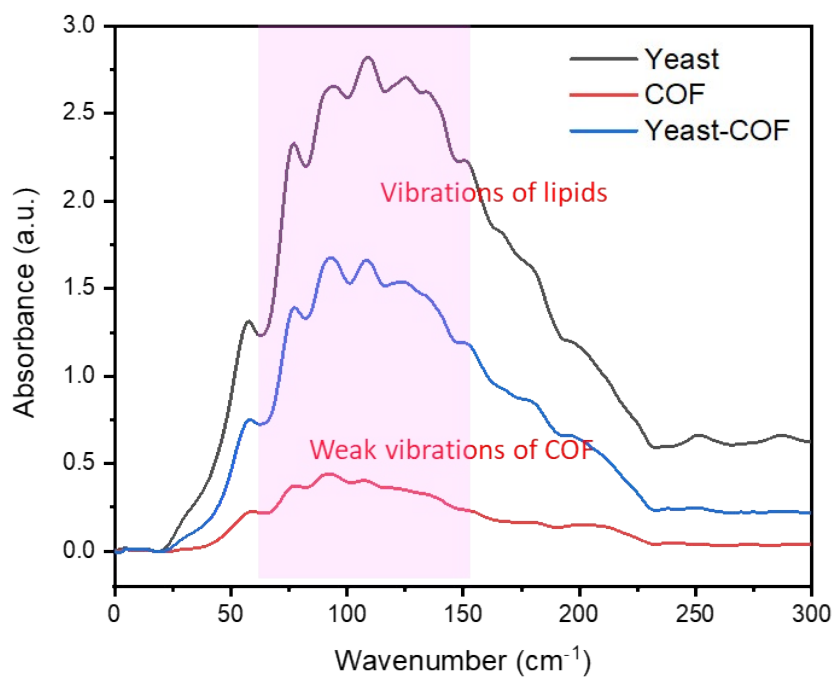

**Figure S7.** Synchrotron THz/Far-IR spectra of native yeast, COF, and yeast-COF.

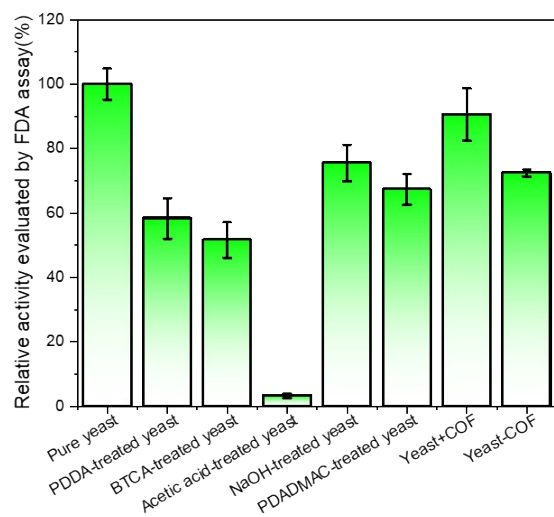

**Figure S8.** Cell activity evaluated by FDA assay upon different precursors treatment.

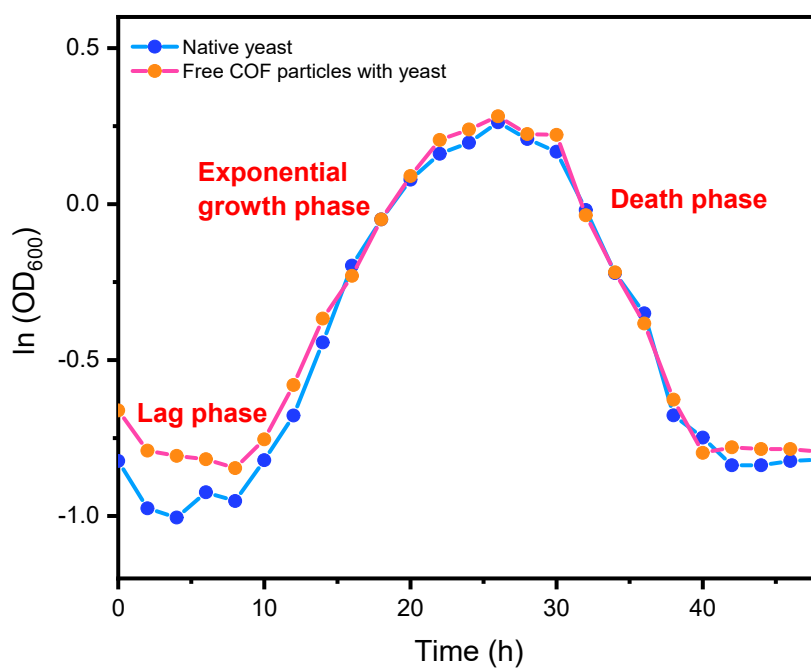

**Figure S9.** Yeast growth measurement ( $OD_{600}$ ) for native yeasts and yeasts in the presence of free COF-LZU1 particles.

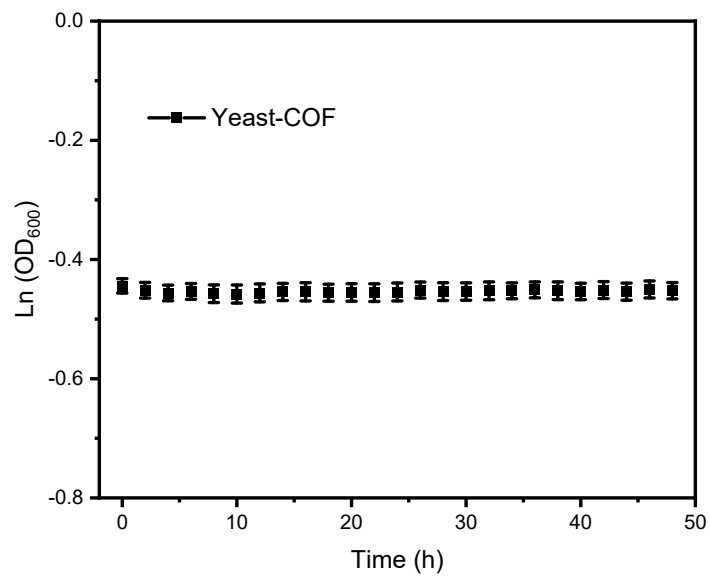

**Figure S10.** Yeast growth measurement (OD<sub>600</sub>) for yeast-COF.

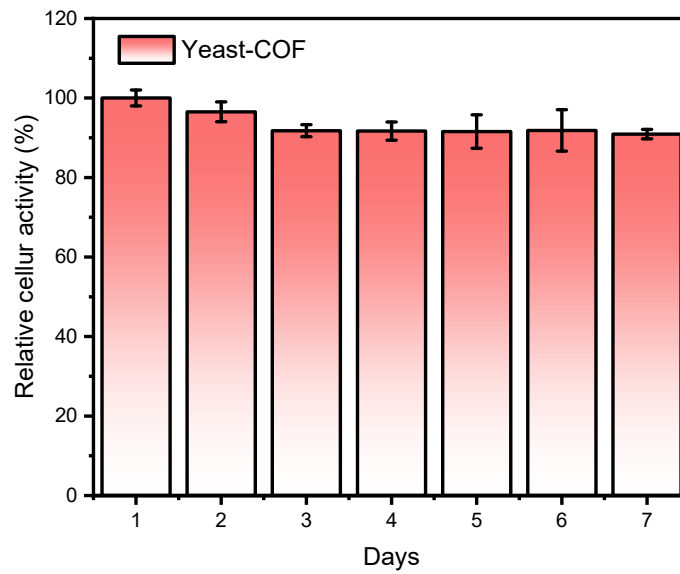

**Figure S11.** The relative cellular activity of yeast-COF after incubation in a cell medium for a week.



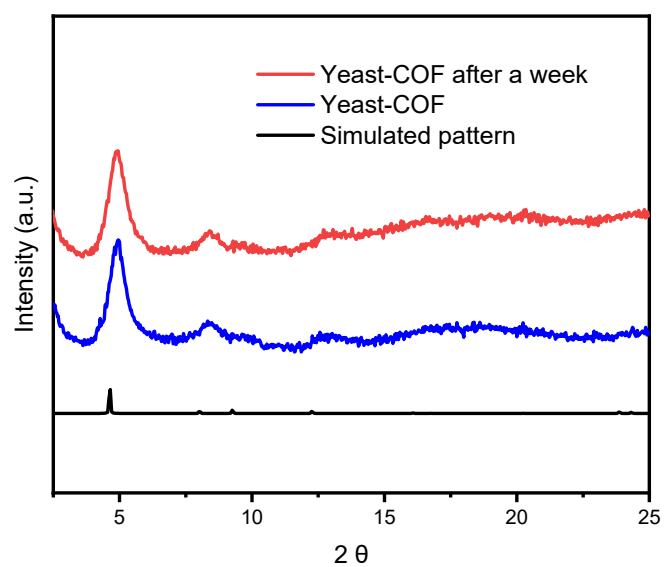

**Figure S12.** XRD spectra after incubation in the cell medium for a week.

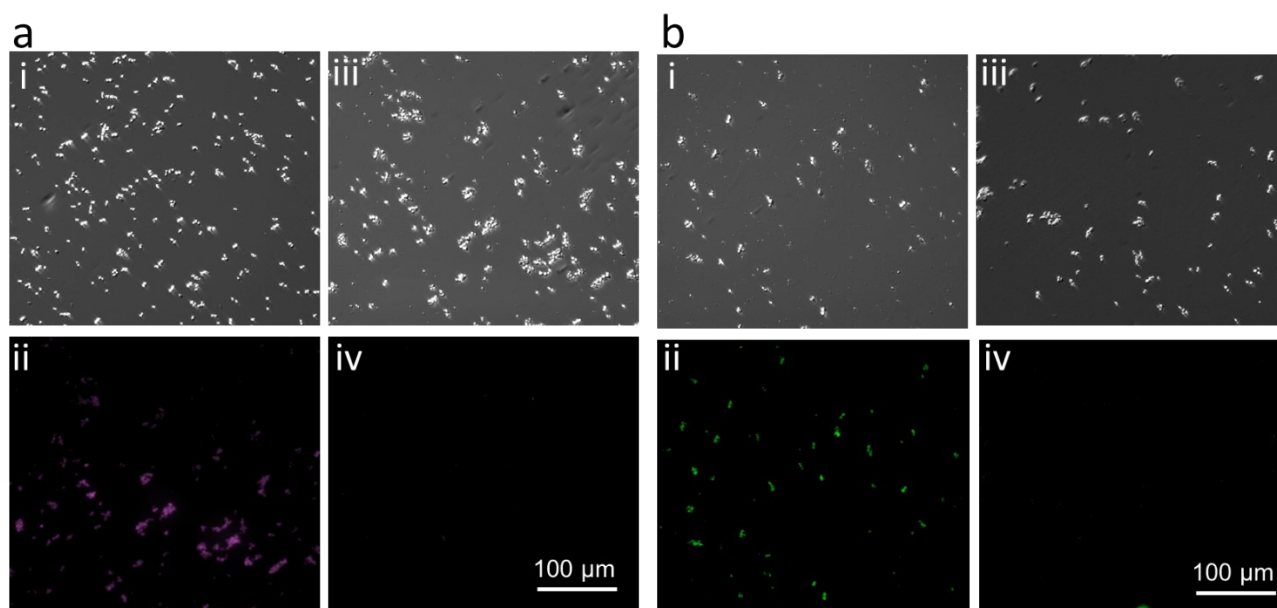

**Figure S13.** Cell activity evaluated by (a) resazurin assay and (b) FDA assay on (i, ii) yeast-COF and (iii, iv) native yeast cells upon high temperature treatment at 75 °C for 30 min.

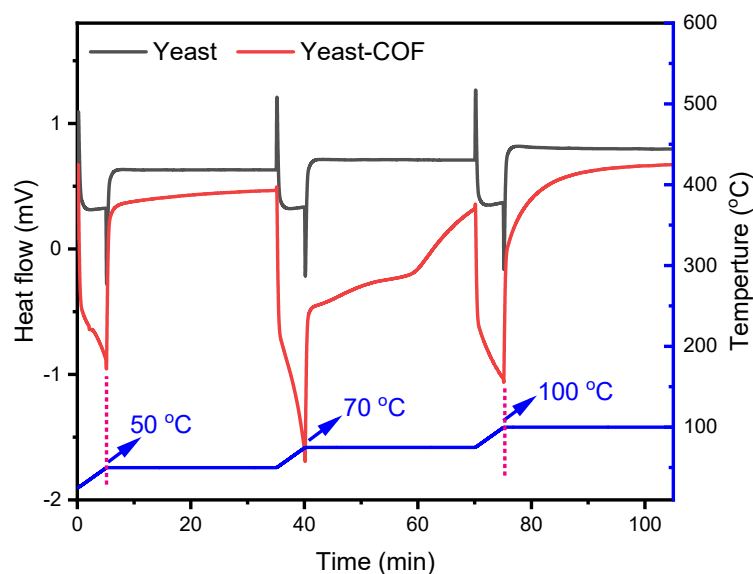

**Figure S14.** DSC analysis of native yeast and yeast-COF cells at 50 °C, 75 °C and 100 °C. Yeast-COF exhibited the greater heat flow, indicating that the COF shells effectively reradiate incident heat energy. The blue curve is the increased temperature with time.

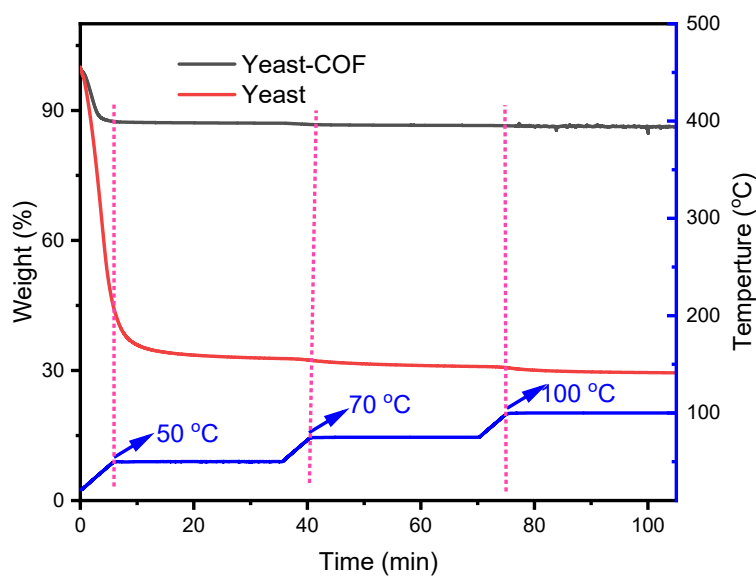

**Figure S15.** TGA analysis of native yeast and yeast-COF cells at 50 °C, 75 °C and 100 °C. The blue curve is the increased temperature with time.

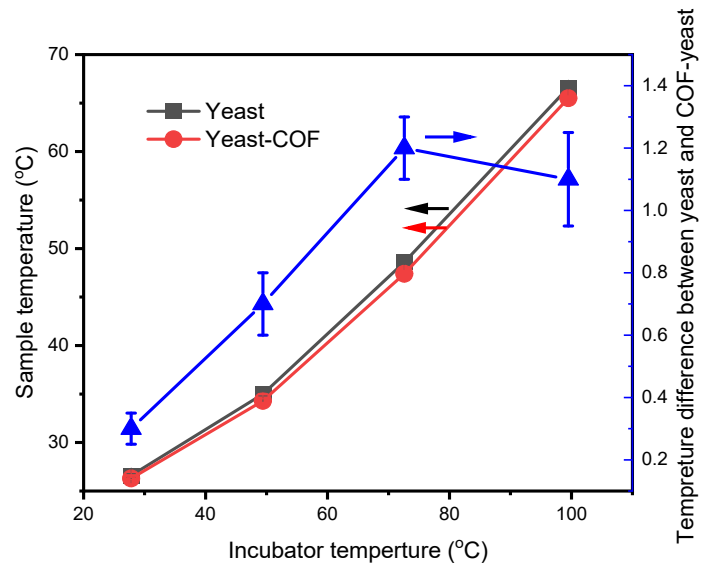

**Figure S16.** Sample surface temperatures and temperature difference obtained from native yeast and yeast-COF exposed to a range of temperatures ( $\sim 30$  to  $100$  °C).

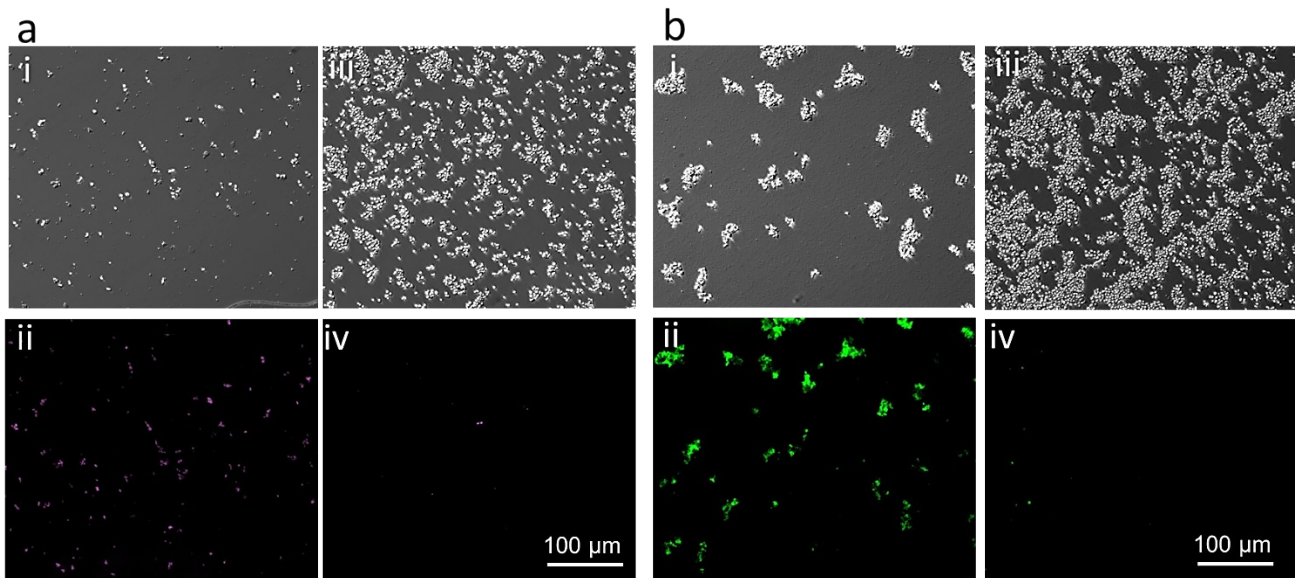

**Figure S17.** Cell activity evaluated by (a) resazurin assay and (b) FDA assay on (i, ii) yeast-COF and (iii, iv) native yeast cells upon pH 2 treatment for one hour.

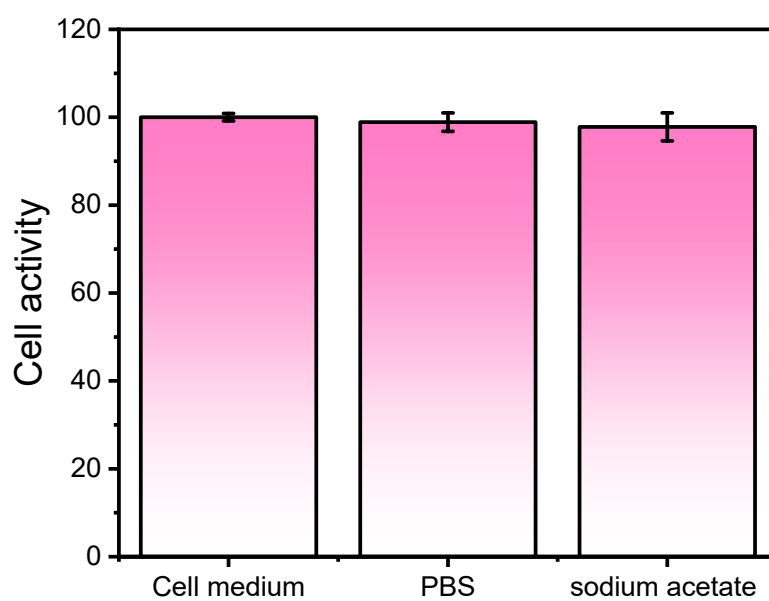

**Figure S18.** Cell activity evaluated by resazurin assay upon different buffer salt.

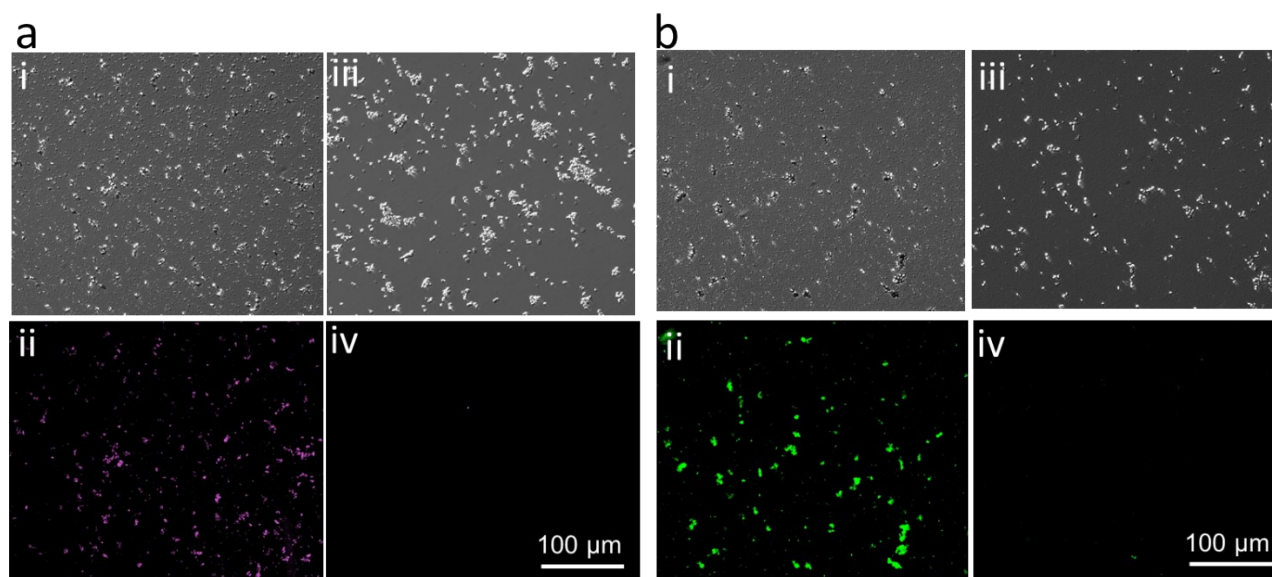

**Figure S19.** Cell activity evaluated by (a) resazurin assay and (b) FDA assay on (i, ii) yeast-COF and (iii, iv) native yeast cells upon UV irradiation (254 nm) for four hours.

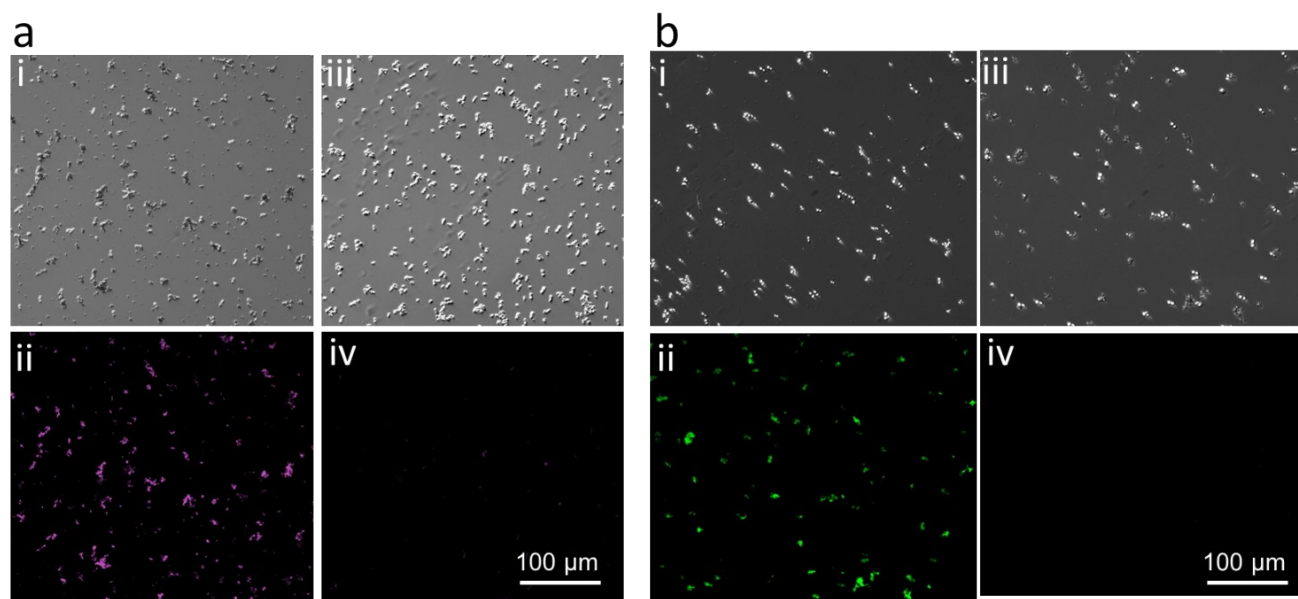

**Figure S20.** Cell activity evaluated by (a) resazurin assay and (b) FDA assay on (i, ii) yeast-COF and (iii, iv) native yeast cells upon 1M  $\text{CuCl}_2$  treatment for one hour.

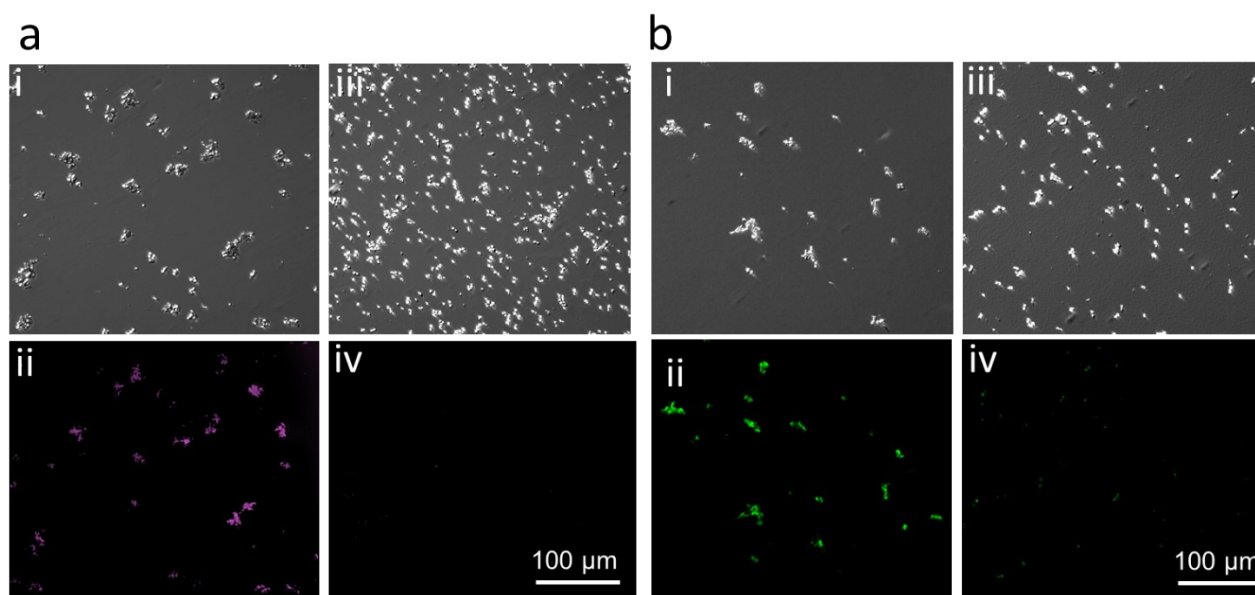

**Figure S21.** Cell activity evaluated by (a) resazurin assay and (b) FDA assay on (i, ii) yeast-COF and (iii, iv) native yeast cells upon 500 mM  $\text{H}_2\text{O}_2$  treatment for one hour.

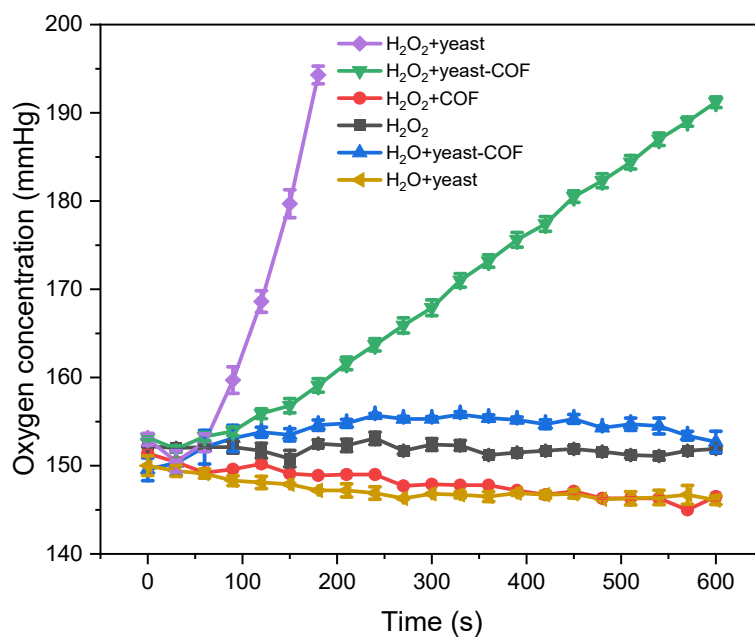

**Figure S22.** Oxygen concentration under different conditions in the condition of 100 mM H<sub>2</sub>O<sub>2</sub>.

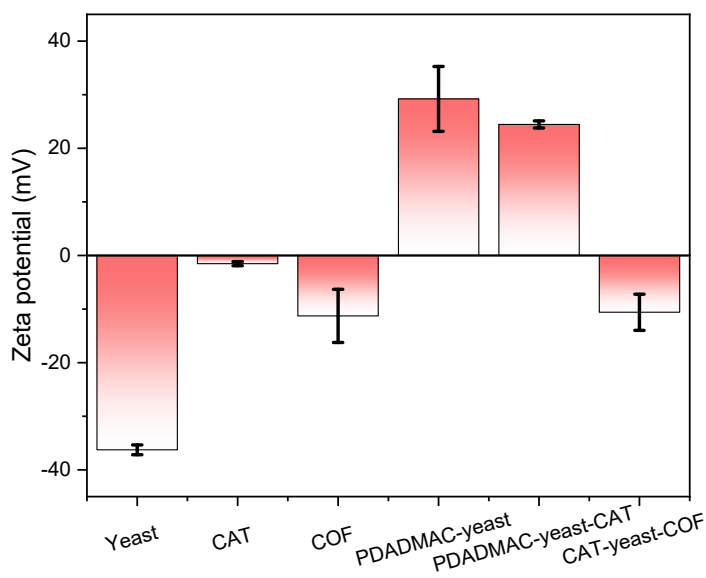

**Figure S23.** The zeta potential of the samples during the CAT-yeast-COF synthetic process.

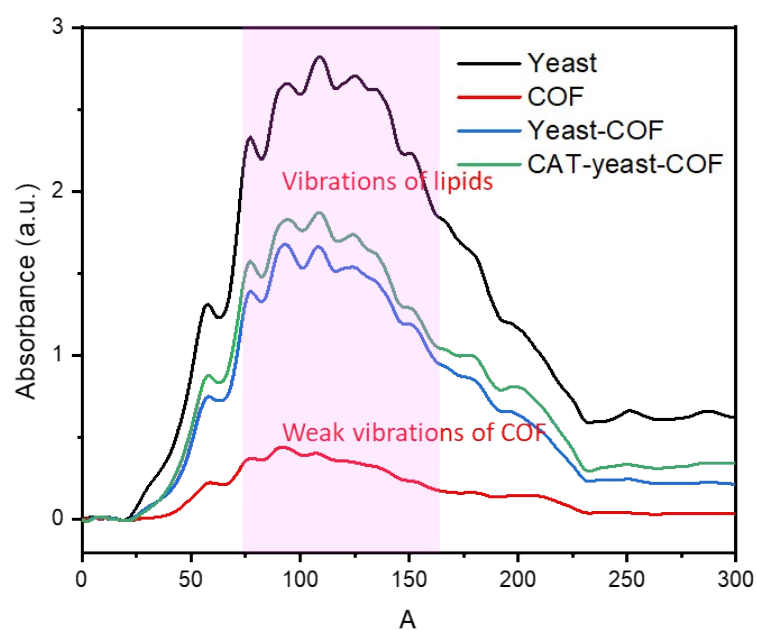

**Figure S24.** Synchrotron THz/Far-IR spectra of CAT-yeast-COF in comparison with other samples.

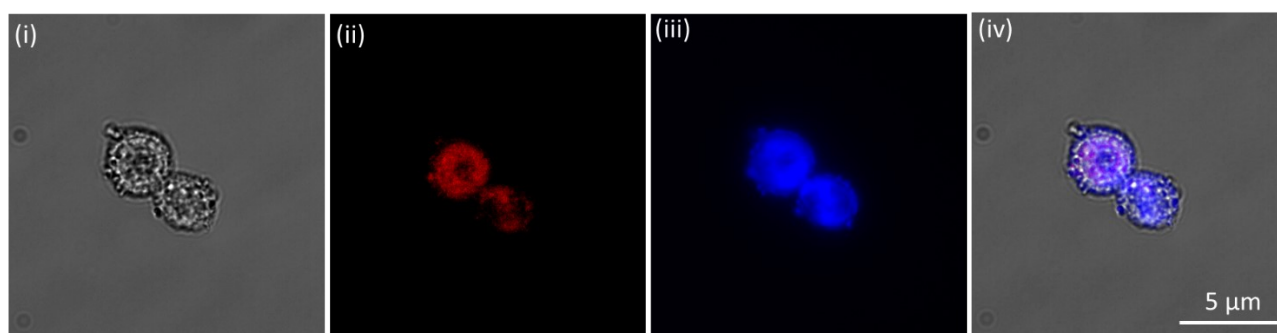

**Figure S25.** The homogeneous formation of the CAT-COF-based exoskeleton around yeast. (i) bright filed image; (ii) Fluorescent image of Atto 647N NHS ester-labelled CAT (red); (iii) Fluorescent image of Alexa Fluor 350-labelled COF-LZU1 (blue); (iv) The mixture image of (i), (ii) and (iii). The enzyme loading efficiency is 50.0%, which is calculated by subtracting the Alexa Fluor 350 in the supernatant after synthesis.

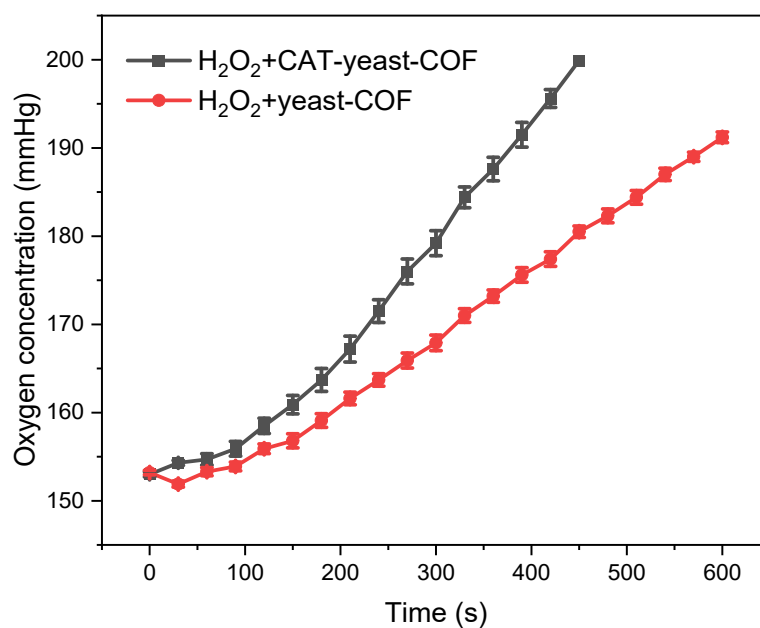

**Figure S26.** Oxygen concentration produced by CAT-yeast-COF and yeast-COF in the condition of 100 mM H<sub>2</sub>O<sub>2</sub>.

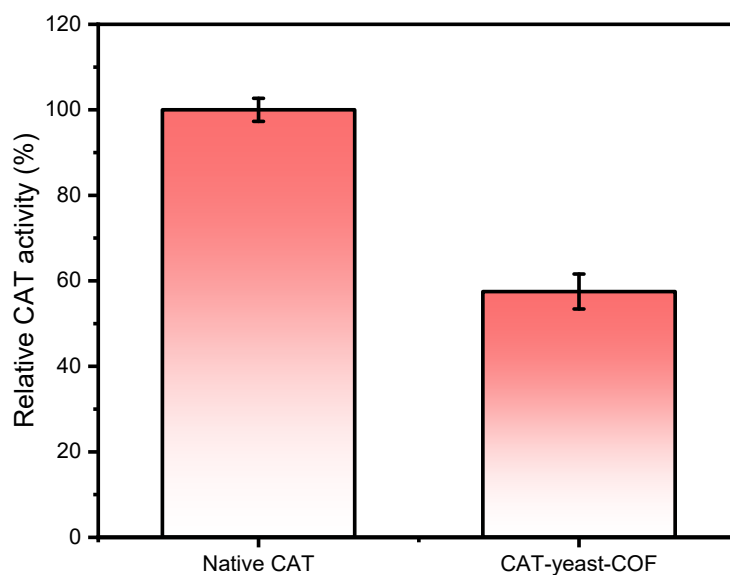

**Figure S27.** Relative CAT activity upon immobilization on the yeast-COF.



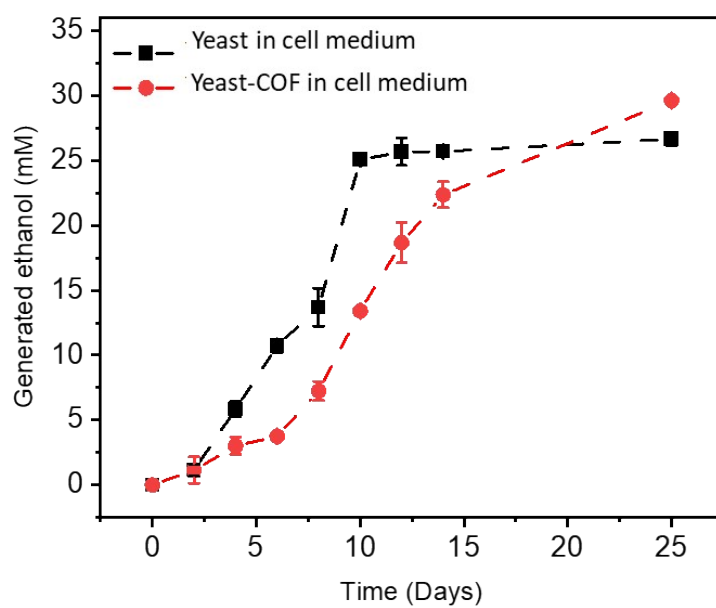

**Figure S28.** Ethanol production of bare yeast and yeast-COF under the cell media for 25 days.

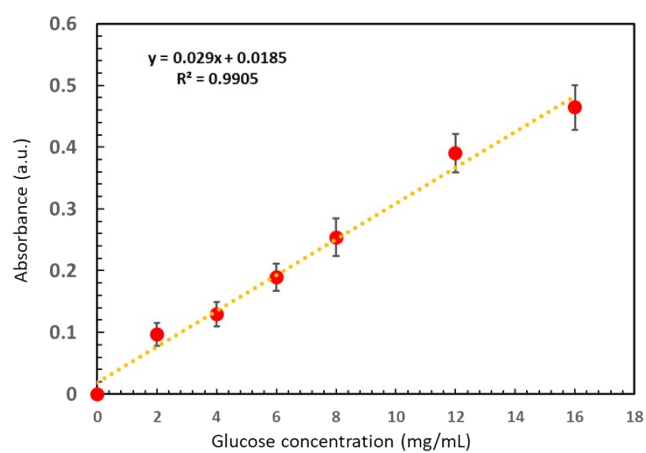

**Figure S29.** Glucose standard curves in the range of 0-16 mg/mL.

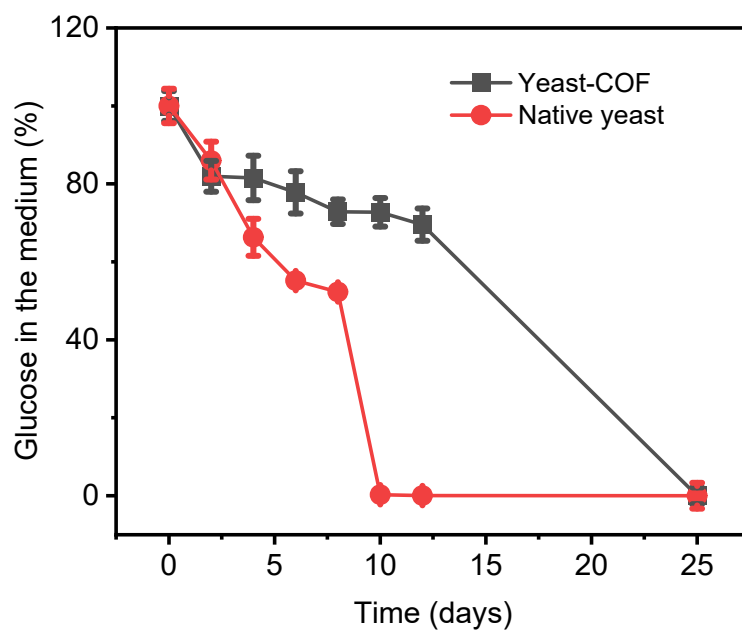

**Figure S30.** Retention of glucose in the culture medium during fermentation for 25 days.

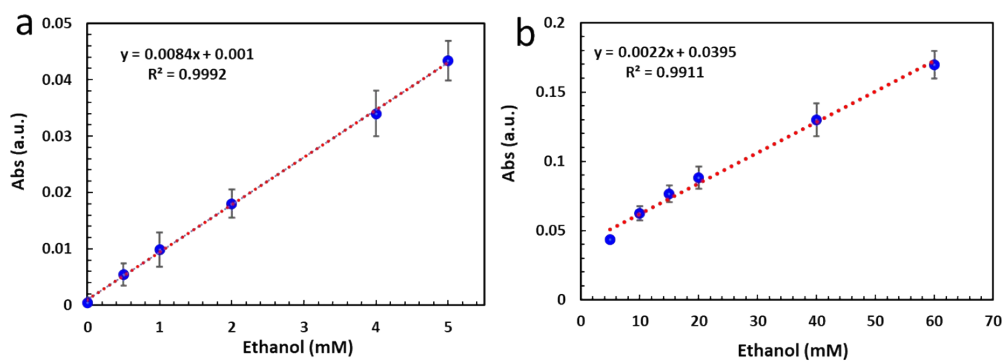

**Figure S31.** Ethanol standard curves in the range of (a) 0-5 mM and (b) 5-60 mM.

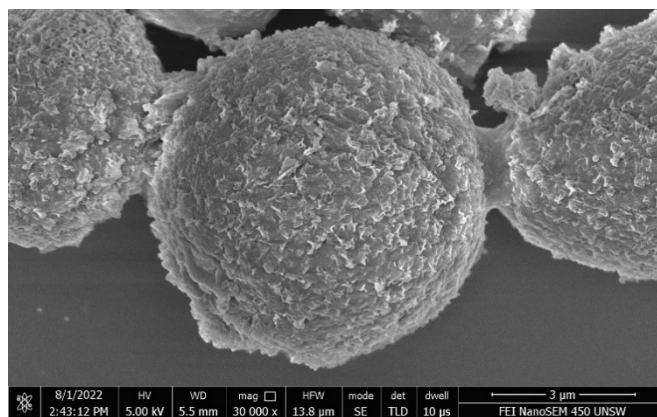

**Figure S32.** SEM image of yeast-ZIF-8.

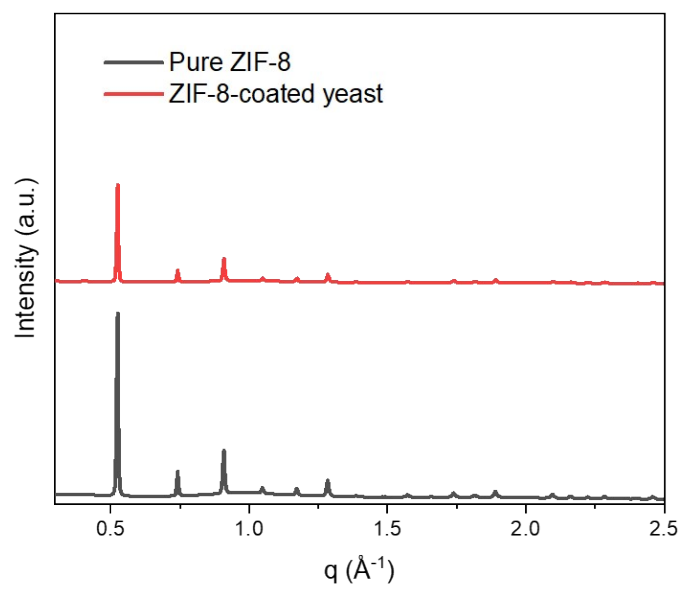

**Figure S33.** SAXS spectra of pure ZIF-8 and yeast-ZIF-8.

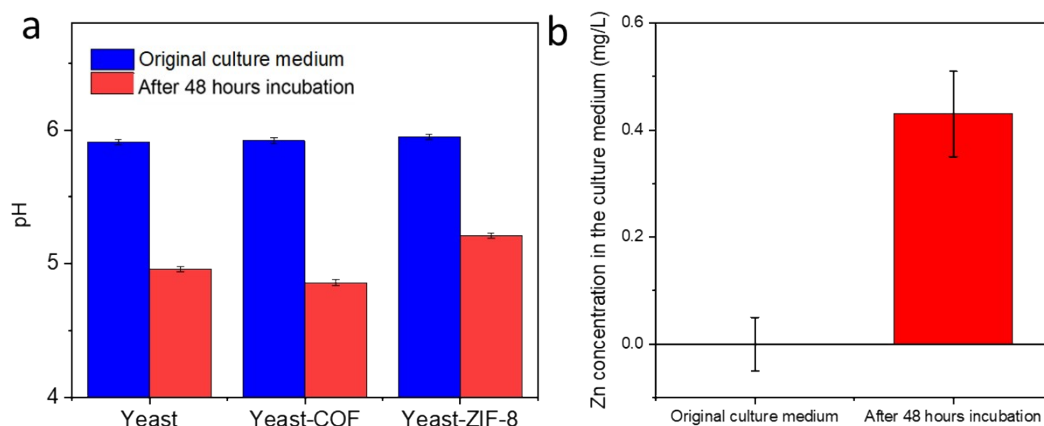

**Figure S34.** (a) pH of yeast, yeast-COF and yeast-ZIF-8 in cell medium before and after incubation for 48 hours. (b) ICP result of cell medium after incubation with the yeast-ZIF-8 for 48 hours.

#### References:

- [1] J. Liang, J. Ruan, B. Njegic, A. Rawal, J. Scott, J. Xu, C. Boyer and K. Liang, Insight into Bioactivity of In-situ Trapped Enzyme-Covalent-organic Frameworks, *Angew. Chem. Int. Ed.*, 2023, e202303001.
- [2] K. Liang, J. J. Richardson, J. Cui, F. Caruso, C. J. Doonan and P. Falcaro, Metal–Organic Framework Coatings as Cytoprotective Exoskeletons for Living Cells, *Adv. Mater.*, 2016, **28**, 7910-7914.
- [3] K. Liang, J. J. Richardson, C. J. Doonan, X. Mulet, Y. Ju, J. Cui, F. Caruso and P. Falcaro, An Enzyme-Coated Metal–Organic Framework Shell for Synthetically Adaptive Cell Survival, *Angew. Chem. Int. Ed.*, 2017, **56**, 8510-8515.
- [4] Z. Ji, H. Zhang, H. Liu, O. M. Yaghi and P. Yang, Cytoprotective metal-organic frameworks for anaerobic bacteria, *PNAS*, 2018, **115**, 10582-10587.
- [5] L. Shi, A. Li, W. Zhang, H. Wu and Y. Chi, Endowing chloroplasts with artificial “cell walls” using metal–organic frameworks, *Nanoscale*, 2020, **12**, 11582-11592.
- [6] J. H. Park, K. Kim, J. Lee, J. Y. Choi, D. Hong, S. H. Yang, F. Caruso, Y. Lee and I. S. Choi, A Cytoprotective and Degradable Metal–Polyphenol Nanoshell for Single-Cell Encapsulation, *Angew. Chem. Int. Ed.*, 2014, **53**, 12420-12425.
- [7] B.J. Kim, T. Park, H.C. Moon, S.Y. Park, D. Hong, E.H. Ko, J.Y. Kim, J.W. Hong, S.W. Han, Y.G. Kim, I.S. Choi. Cytoprotective Alginate/Polydopamine Core/Shell Microcapsules in Microbial Encapsulation, *Angew. Chem. Int. Ed.*, 2014, **53**, 14443-14446.
- [8] G. Wang, L. Wang, P. Liu, Y. Yan, X. Xu and R. Tang Extracellular Silica Nanocoat Confers Thermotolerance on Individual Cells: A Case Study of Material-Based Functionalization of Living Cells, *ChemBioChem*, 2010, **11**, 2368-2373.

- [9] E. H. Ko, Y. Yoon, J. H. Park, S. H. Yang, D. Hong, K.-B. Lee, H. K. Shon, T. G. Lee and I. S. Choi, Bioinspired, Cytocompatible Mineralization of Silica–Titania Composites: Thermoprotective Nanoshell Formation for Individual Chlorella Cells, *Angew. Chem. Int. Ed.*, 2013, **52**, 12279-12282.
- [10] A. I. Zamaleeva, I. R. Sharipova, A. V. Porfireva, G. A. Evtugyn, R. F. Fakhrullin. Polyelectrolyte-Mediated Assembly of Multiwalled Carbon Nanotubes on Living Yeast Cells. *Langmuir.*, 2010, **26**, 4, 2671–2679.
